# Supplementary material for: Weakly coordinated Li ion in single-ion-conductor-based composite enabling low electrolyte content Li-metal batteries
Source: Springer Nature journal article supplement (doi:10.1038/s41467-023-39673-1), 2023-07-08
Supplement: MOESM1 [file 41467_2023_39673_MOESM1_ESM.pdf]

# Supplementary Information

of

## Weakly coordinated Li ion in single-ion-conductor-based composite enabling low electrolyte content Li-metal batteries

Hyeokjin Kwon<sup>1</sup>, Hyun-Ji Choi<sup>1</sup>, Jung-kyu Jang<sup>2</sup>, Jinhong Lee<sup>1</sup>, Jinkwan Jung<sup>1</sup>, Wonjun Lee<sup>3</sup>, Youngil Roh<sup>1</sup>, Jaewon Baek<sup>1</sup>, Dong Jae Shin<sup>1</sup>, Ju-Hyuk Lee<sup>1</sup>, Nam-Soon Choi<sup>1\*</sup>, Ying Shirley Meng<sup>4,5\*</sup>, Hee-Tak Kim<sup>1,6\*</sup>

<sup>1</sup>Department of Chemical and Biomolecular Engineering, Korea Advanced Institute of Science and Technology (KAIST), Daejeon, Republic of Korea

<sup>2</sup>Energy Materials Research Center, Korea Research Institute of Chemical Technology (KRICT), Daejeon, Republic of Korea

<sup>3</sup>Department of Energy Engineering, School of Energy and Chemical Engineering, Ulsan National Institute of Science and Technology (UNIST), Ulsan, Republic of Korea

<sup>4</sup>Department of NanoEngineering, University of California at San Diego, San Diego, 92093, California, USA

<sup>5</sup>Pritzker School of Molecular Engineering, University of Chicago, Chicago, IL, USA

<sup>6</sup>Advanced Battery Center, KAIST Institute for the NanoCentury, Korea Advanced Institute of Science and Technology (KAIST), Daejeon, Republic of Korea

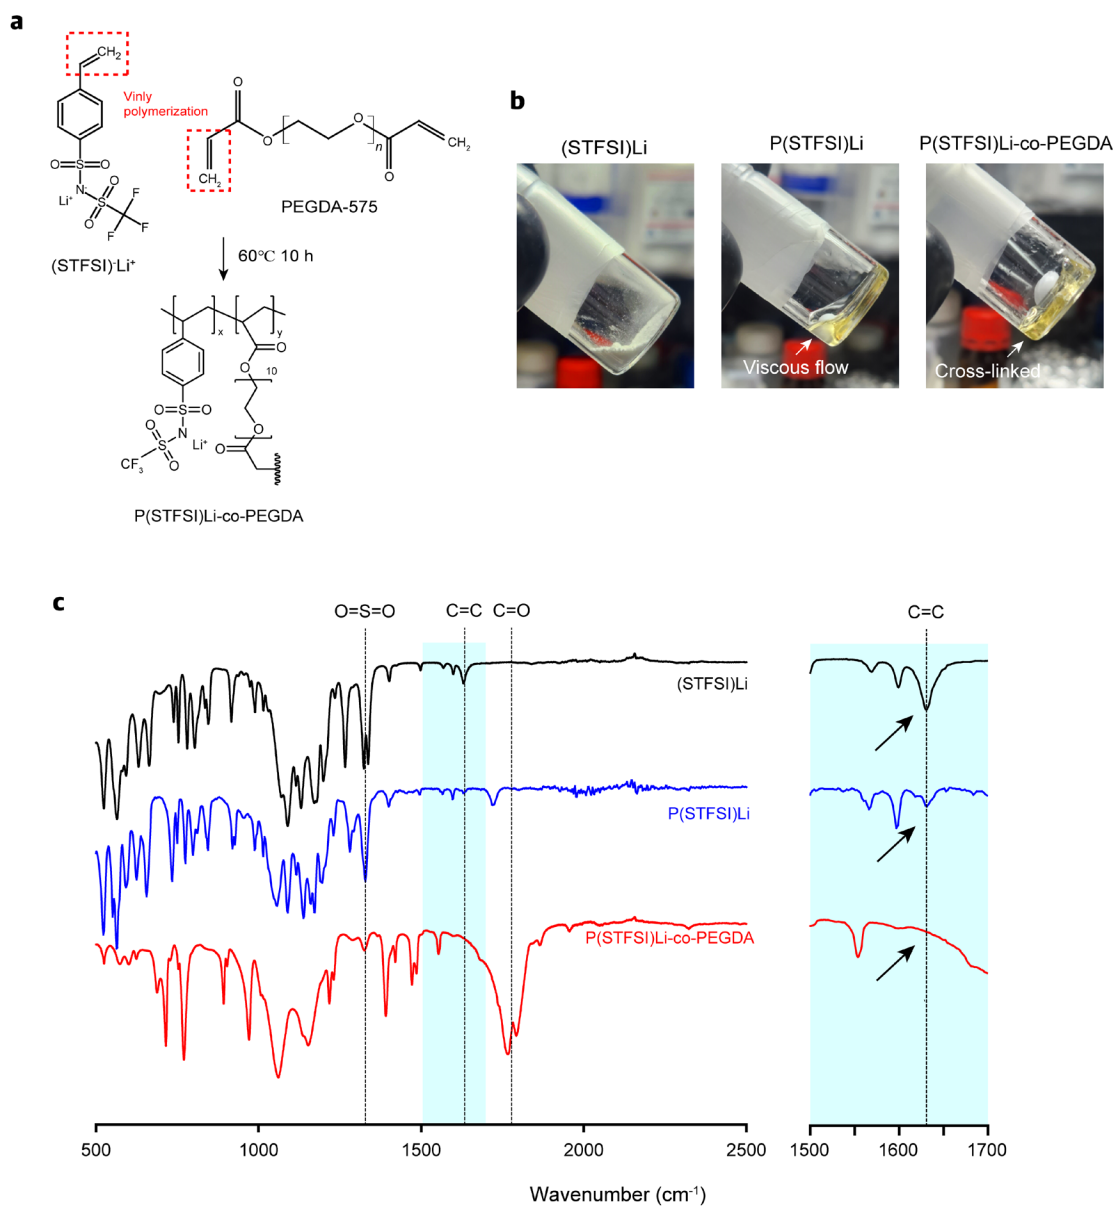

**Supplementary Figure 1. Synthesis of S-PE (P(STFSI)Li-co-PEGDA).** **a**, Chemical structures of (STFSI)Li, PEGDA and P(STFSI)Li-co-PEGDA. **b**, **c**, Optic images and FTIR spectra of (STFSI)Li, P(STFSI)Li, and P(STFSI)Li-co-PEGDA.

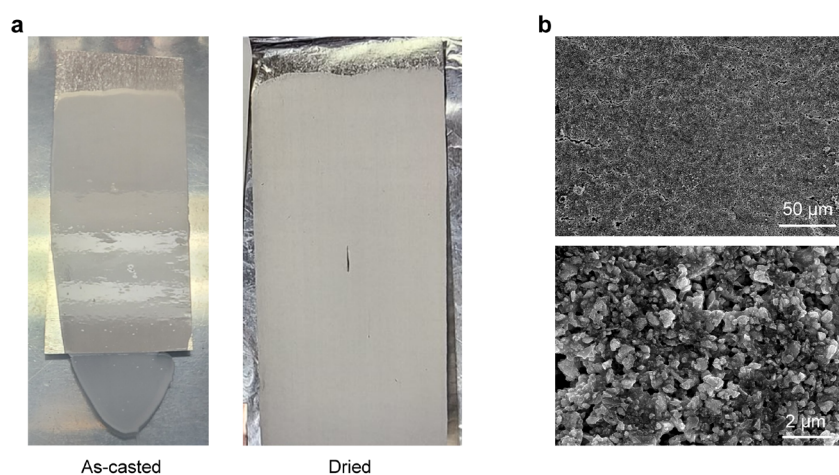

**Supplementary Figure 2. Photographs and SEM of Li|S-CE/S-PE.** **a**, Optic images of as-casted S-CE/S-PE on Li and dried S-CE/S-PE layer on Li. **b**, SEM images of S-CE/S-PE composite.

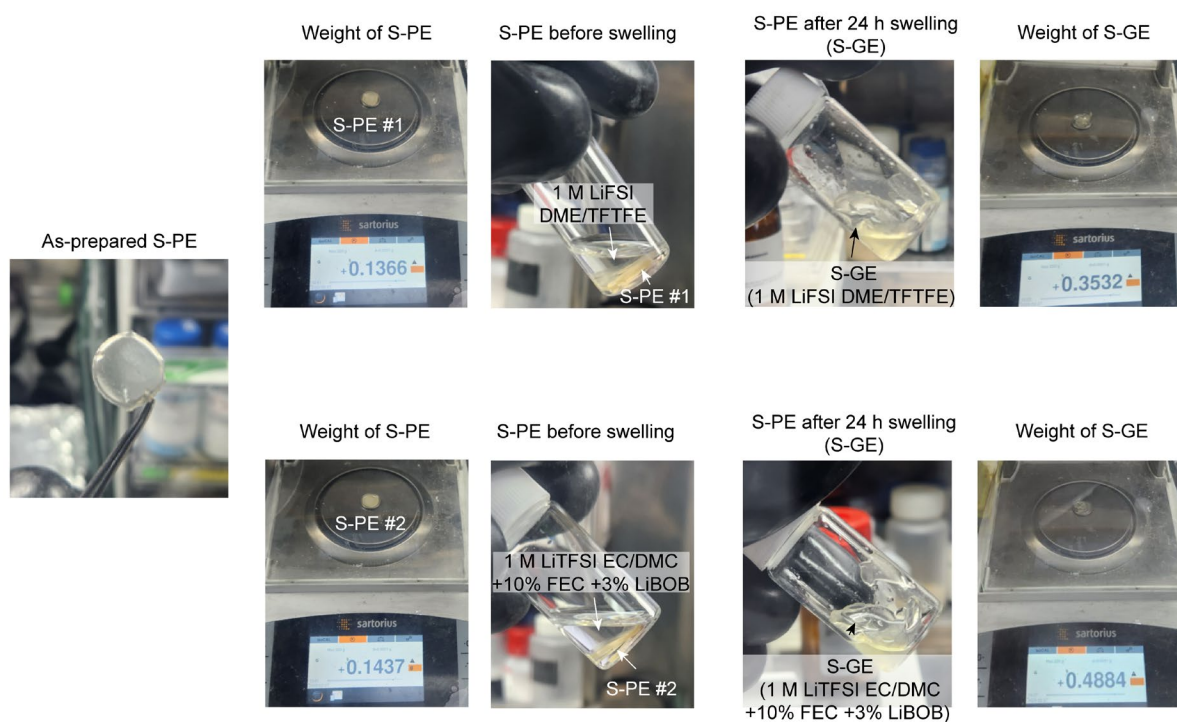

**Supplementary Figure 3. Measurement of the equilibrium swelling ratio for S-PE.**

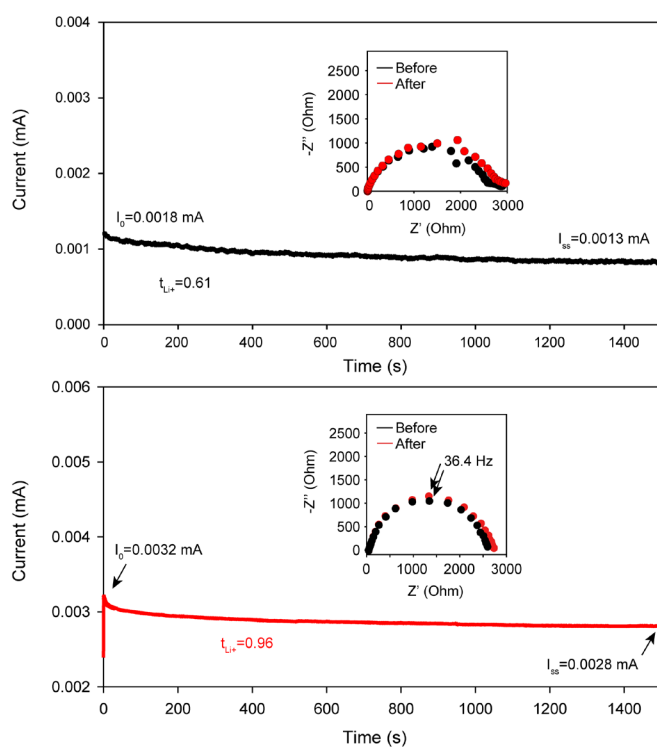

**Supplementary Figure 4.  $\text{Li}^+$  transference number.**  $\text{Li}^+$  transference number measurement for S-CE/B-PE (top) and S-CE/G-PE (bottom).

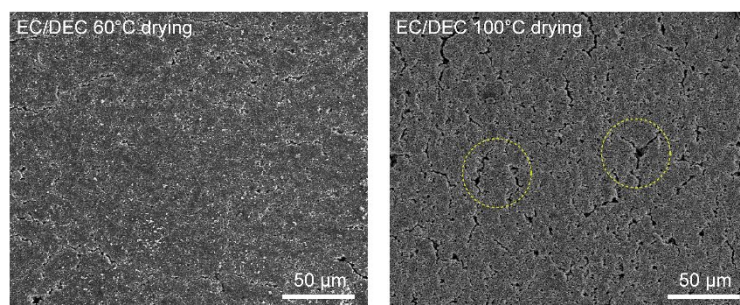

**Supplementary Figure 5. Morphology of S-CE/S-PE composite layer at different drying temperatures.**

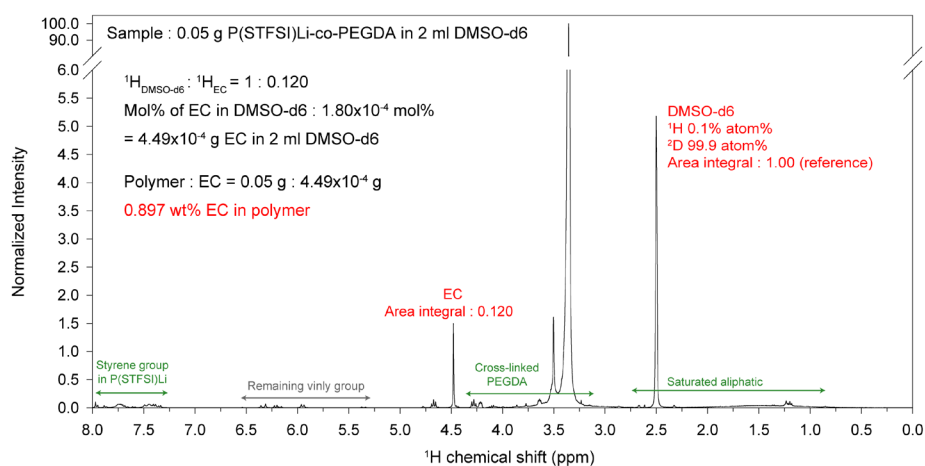

**Supplementary Figure 6. NMR spectra of P(STFSI)Li-co-PEGDA in DMSO-d6.** The amount of EC remaining after the drying process was detected through NMR spectra of a solution in which a polymer was dissolved in DMSO-d6.

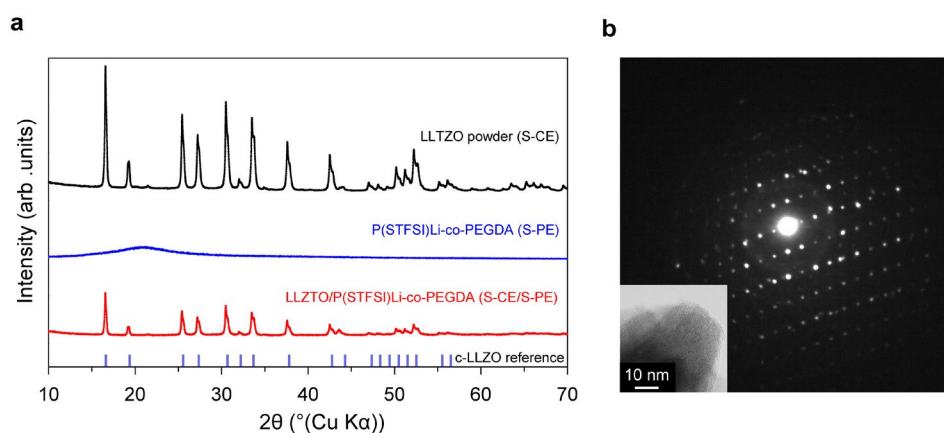

**Supplementary Figure 7. XRD analysis for the S-CE/S-GE.** **a**, X-ray diffraction spectroscopy (XRD) spectra of the pristine LLZTO powder (S-CE, 500 nm) and the fabricated S-CE/S-PE on SUS. **b**, Selected area electron diffraction (SAED) of S-CE/S-PE.

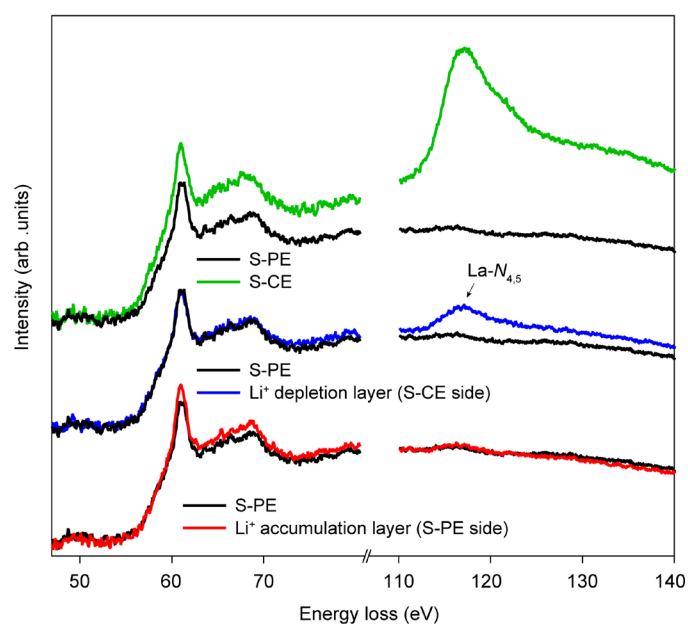

**Supplementary Figure 8. EELS line spectra of S-CE/S-PE interface.**

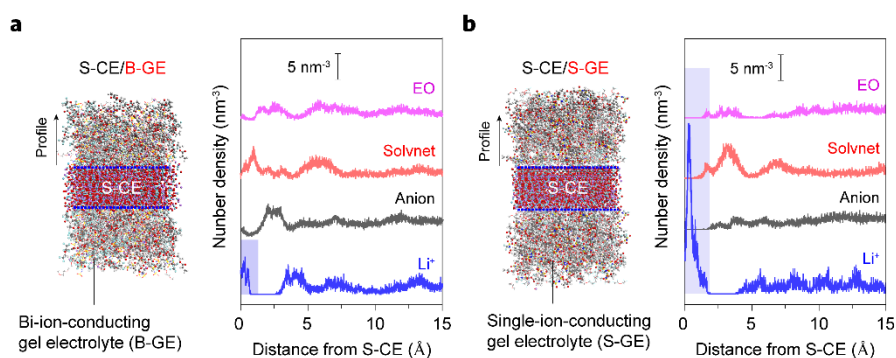

**Supplementary Figure 9. Number density profiles at the ceramic/polymer interface. a, b,** Snapshots of MD simulations and corresponding number density profiles of  $\text{Li}^+$  and electrolyte molecules at the interface of S-CE/B-GE (a) and S-CE/S-GE (b). The zero position corresponds to the outmost layer of the S-CE.

### Supplementary Note 1. Number density at the ceramic-polymer interface

For the S-CE/B-GE, anions in the B-GE are dragged to the interface by the coulombic interaction with the  $\text{Li}^+$  accumulation layer, constituting a high number density ( $4.1 \text{ nm}^{-3}$ , higher than that of bulk B-GE). In contrast, at the S-CE/S-GE interface, the number density of anions is low ( $1.1 \text{ nm}^{-3}$ ) because the anions in the S-GE are immobilized. The interface structure of the S-CE/B-GE resembles a diffuse double layer structure due to the mobility freedom of  $\text{Li}^+$  and anions in the B-GE; in contrast, at the S-CE/S-GE interface, excess  $\text{Li}^+$  forms a

compact  $\text{Li}^+$  accumulation layer, because the anions cannot be redistributed in the S-GE phase to stabilize the  $\text{Li}^+$  space charge. It appears that a large amount of solvent is attracted toward the S-CE/S-GE because anions are not attracted toward the interface of S-CE/S-GE. However, solvent molecules that are attracted significantly will feel greater steric hindrance to coordinate  $\text{Li}^+$  than bulk liquids, which can make coordination relatively difficult. We believe that the Raman results we observed have increased free-DME for this reason.

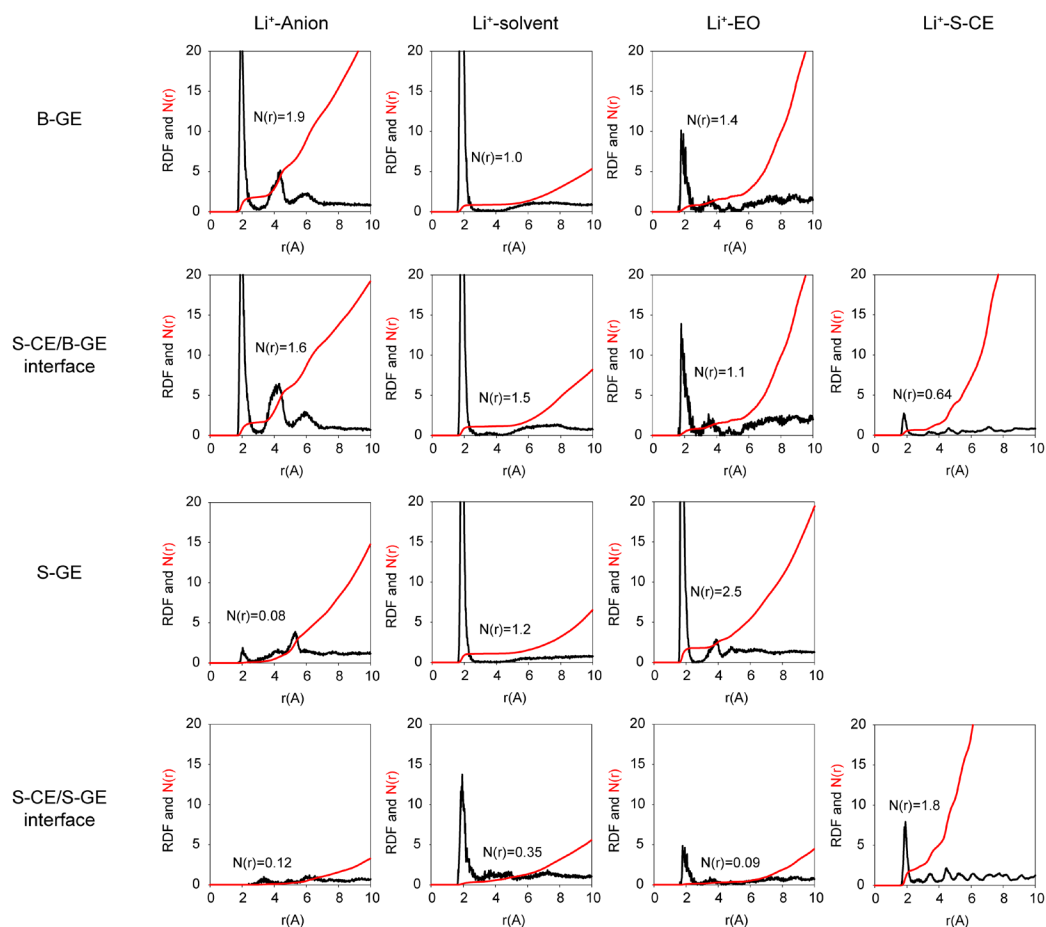

**Supplementary Figure 10. Radial distribution function (RDF) and N(r) for the B-GE, S-CE/B-GE interface, S-GE, and S-CE/S-GE interface.**

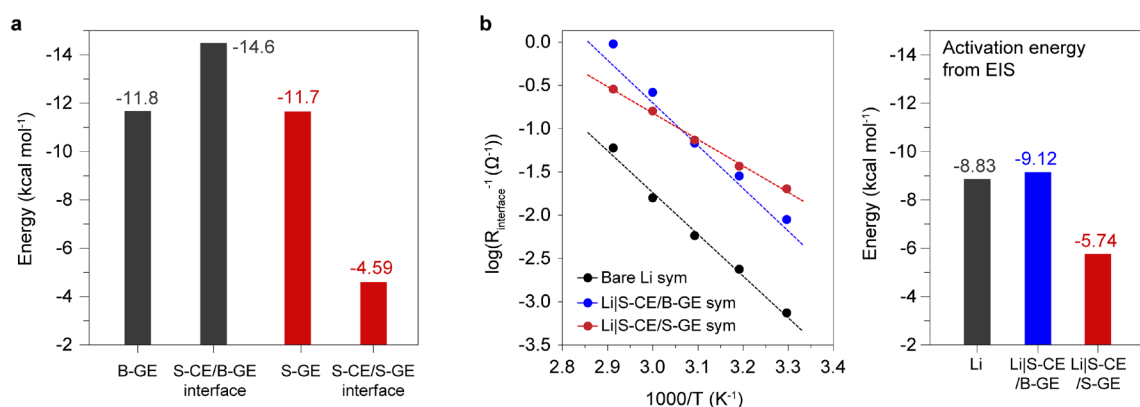

**Supplementary Figure 11.  $\text{Li}^+$  solvation free energy.** **a**, Comparison of  $\text{Li}^+$  solvation free energy calculated from MD simulation among B-GE, S-CE/B-GE interface, S-GE, and S-CE/S-GE interface. **b**, Arrhenius plot for the reciprocal of interfacial resistance for the Li and Li|S-CE/S-GE symmetric cell (left). Comparison of the activation energy determined from the interfacial resistances measured for the Li and Li|S-CE/S-GE symmetric cells (right).

## Supplementary Note 2. Solvation free energy

To experimentally corroborate the weak coordination of  $\text{Li}^+$ , the  $\text{Li}^+$  solvation free energy was calculated by a MD simulation for B-GE, S-CE/B-GE interface, S-GE, and S-CE/S-GE interface and the  $\text{Li}^+$  de-solvation energy was measured by using impedance spectroscopy for the Li and Li|S-CE/S-GE symmetric cells. The B-GE, S-CE/B-GE interface and S-GE, showed similar solvation free energies ( $-11.8$ ,  $-14.6$ , and  $-11.5$  kcal mol $^{-1}$ , respectively). The solvation free energy of the S-CE/S-GE interface was remarkably smaller ( $-4.59$  kcal mol $^{-1}$ ) than those of the B-GE, S-CE/B-GE interface and S-GE, indicating a weakly coordinated  $\text{Li}^+$  structure at the S-CE/S-GE interface. The peculiar coordination structure is dictated by the  $\text{Li}^+$  de-solvation energy obtained from the impedance analysis. The activation energy for the interfacial charge transfer reaction was  $5.74$  kcal mol $^{-1}$  for the Li|S-CE/S-GE electrode, which was lower than that S-CE/B-GE ( $9.12$  kcal mol $^{-1}$ ) and without the S-CE/S-GE ( $8.83$  kcal mol $^{-1}$ ). Since the de-solvation step is the rate-determining step for the Li electrode reaction, the activation energy corresponds with the de-solvation energy<sup>1,2</sup>. Therefore, the small de-solvation energy for the Li|S-CE/S-GE anode indicates that  $\text{Li}^+$  in the S-CE/S-GE more loosely interacts with the surrounding solvent than B-GE.

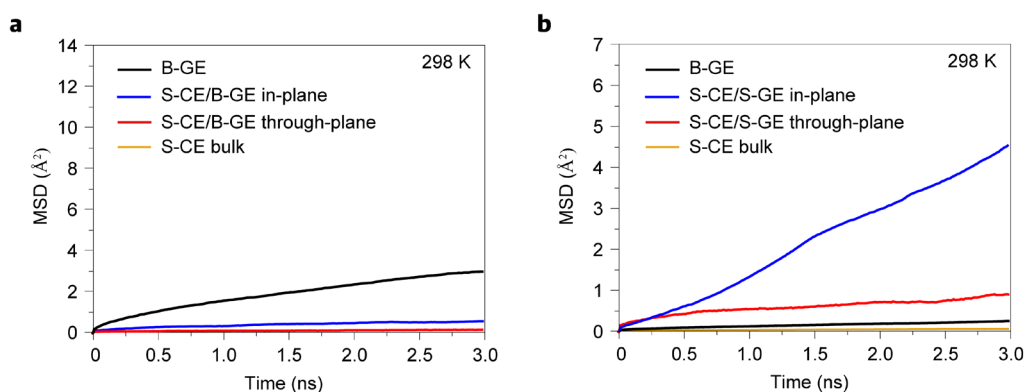

**Supplementary Figure 12. Mean square displacement (MSD).** MSD of  $\text{Li}^+$  in S-CE/B-GE (a) and S-CE/S-GE (b) structures.

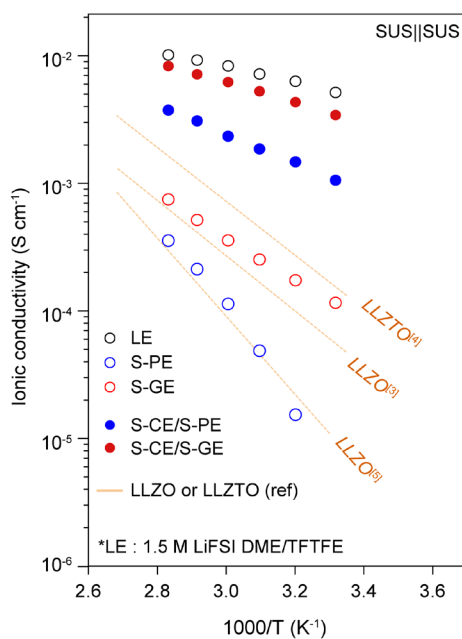

**Supplementary Figure 13. Ionic conductivity and transference number. a,** Ionic conductivities of liquid electrolyte (1.5 M LiFSI DME/TFTFE), S-PE, S-GE, S-CE/S-PE, S-CE/S-GE and literature values for ionic conductivity of LLZO and LLZTO<sup>3-5</sup>. **b,**  $\text{Li}^+$  transference number measurement for S-CE/B-PE (top) and S-CE/G-PE (bottom).

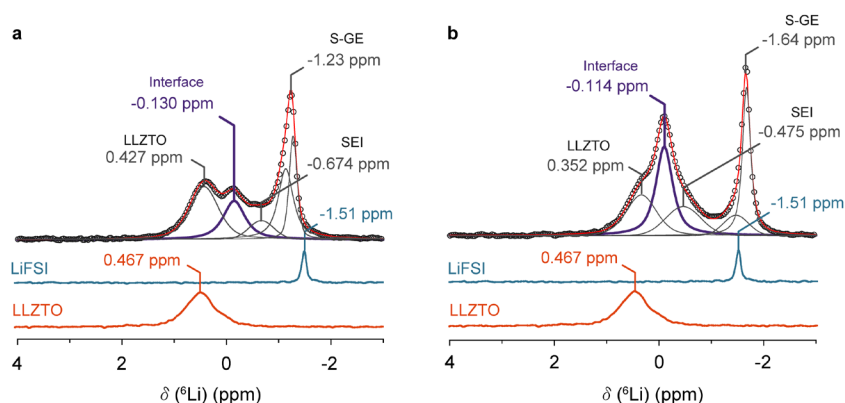

**Supplementary Figure 14.  $^6\text{Li}$  MAS-NMR spectra.** a,b,  $^6\text{Li}$  MAS-NMR spectra of S-CE/S-GE composite with liquid electrolyte before (a) and after (b)  $^6\text{Li}$  exchange ( $0.05 \text{ mA cm}^{-2}$  for 50 h).

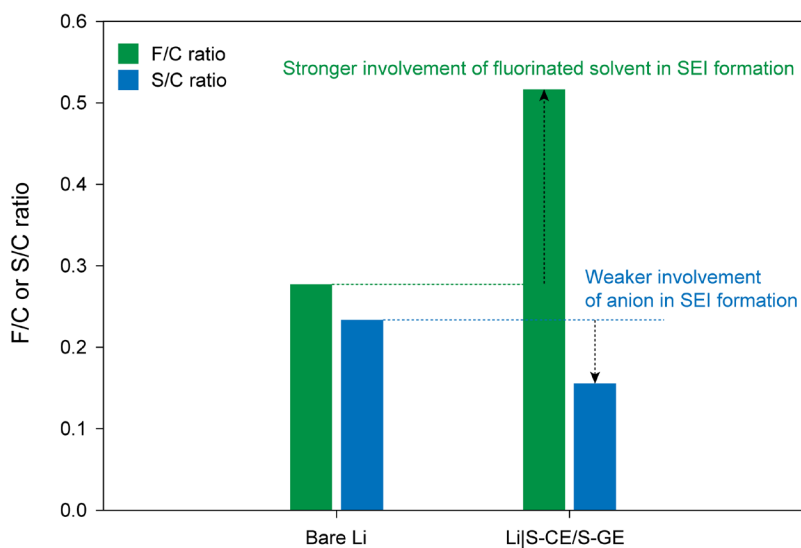

**Supplementary Figure 15. Atomic F/C and S/C ratios of the SEI layers for bare Li and Li|S-CE/S-GE in 1.5 M LiFSI DME +50% TTFTE.**

In the SEI layer of Li|S-CE/S-GE, a high F/C ratio indicates a decrease in DME decomposition (weak organic by-products), and a decrease in the S/C ratio indicates a decrease in anion (FSI<sup>-</sup>) decomposition.

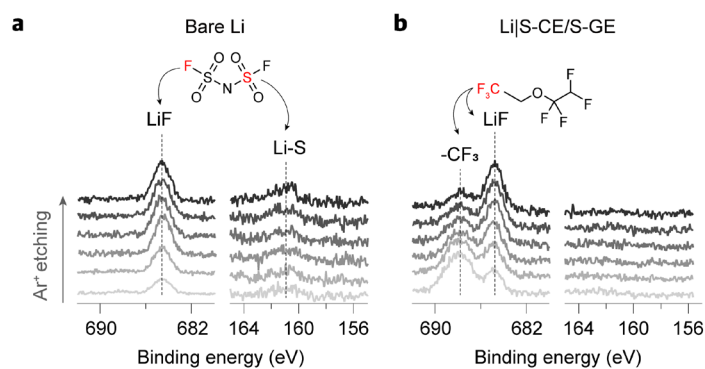

**Supplementary Figure 16. F1s and S2p spectra of SEI layer in 1.5 M LiFSI DME +50% TFTFE. a, Bare Li. b, Li|S-CE/S-GE.**

In the SEI layer of Li|S-CE/S-GE, no decomposition signal of anion was observed, whereas decomposition signal of fluorinated solvent was observed. This means that the fluorinated solvent, not the anion, contributes dominantly to the SEI.

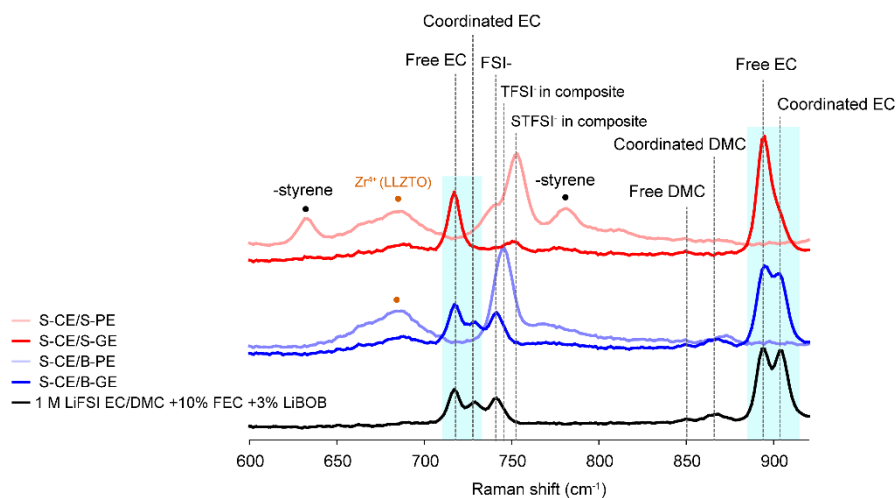

**Supplementary Figure 17. Raman spectra before and after carbonate electrolyte permeation into the S-CE/B-PE and S-CE/S-PE. To distinguish anions in the liquid electrolyte and composite layer, LiFSI-based liquid electrolyte was used in this experiment.**

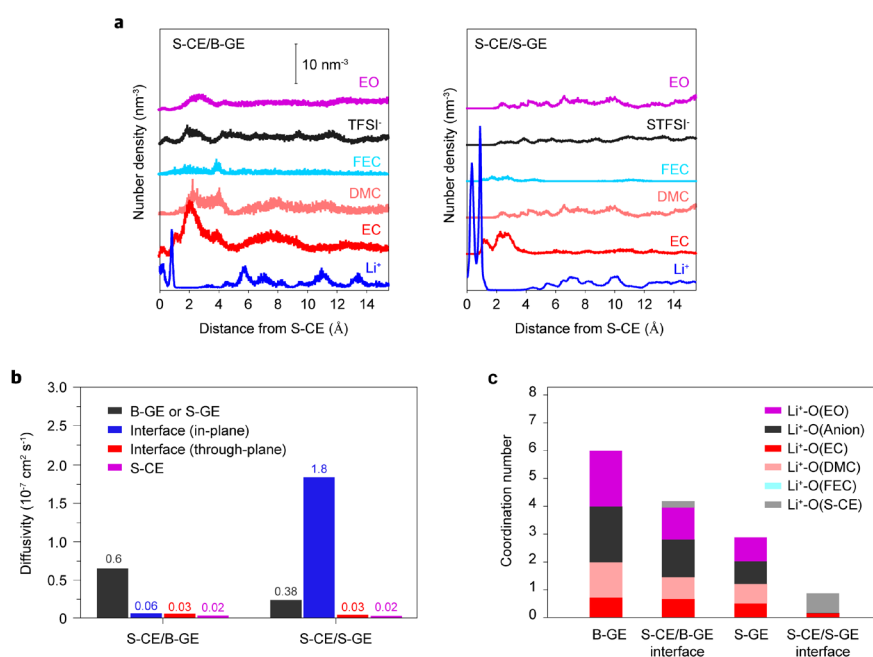

**Supplementary Figure 18. MD simulations with carbonate electrolyte. a, b,** Number density profiles of Li<sup>+</sup> and electrolyte molecules at the interface of S-CE/B-GE (left) and S-CE/S-GE (right). The zero position corresponds to the outmost layer of the S-CE. **b,** Diffusivities of Li<sup>+</sup> in S-CE/B-GE and S-CE/S-GE structures. The diffusivity of Li<sup>+</sup> at the interface was calculated isotropically in the in-plane and through-plane directions, respectively. **c,** Contributions to the coordination number of Li<sup>+</sup> in B-GE, S-CE/B-GE interface, S-GE, and S-CE/S-GE interface.

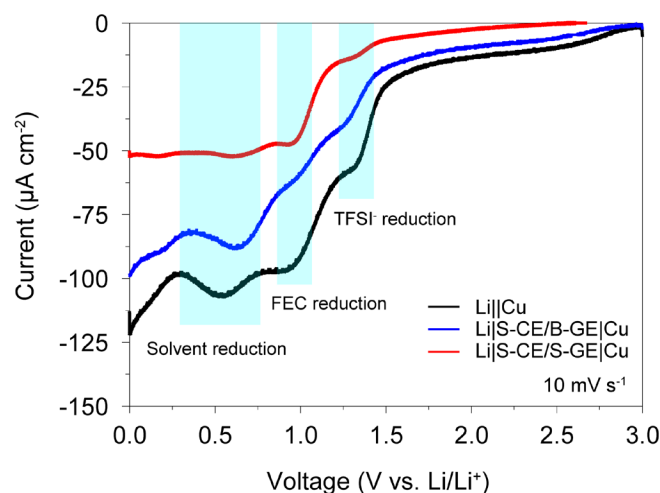

**Supplementary Figure 19. Electrolyte reduction current via LSV in 1 M LiTFSI EC/DMC + 3% LiBOB 10% FEC.**

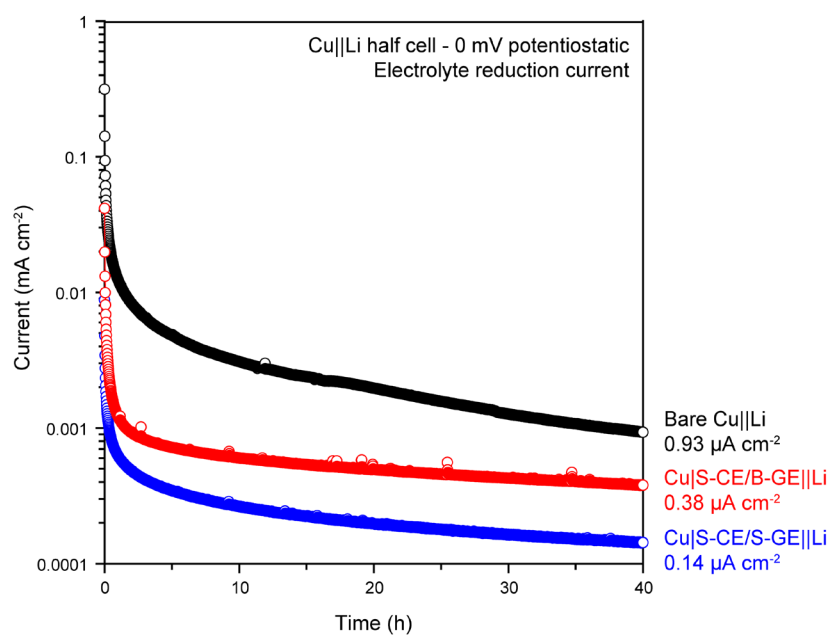

**Supplementary Figure 20. Electrolyte reduction current via CA in 1 M LiTFSI EC/DMC + 3% LiBOB 10% FEC.**

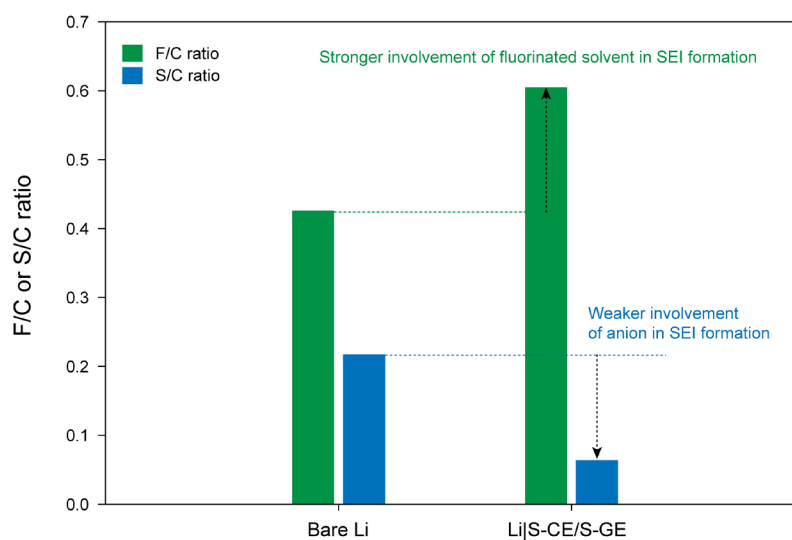

**Supplementary Figure 21. Atomic F/C and S/C ratios of the SEI layers for bare Li and Li|S-CE/S-GE in 1 M LiTFSI EC/DMC +10% FEC +3% LiBOB.**

In the SEI layer of Li|S-CE/S-GE, a high F/C ratio indicates a decrease in EC/DMC decomposition (weak organic by-products), and a decrease in the S/C ratio indicates a decrease in anion (TFSI) decomposition.

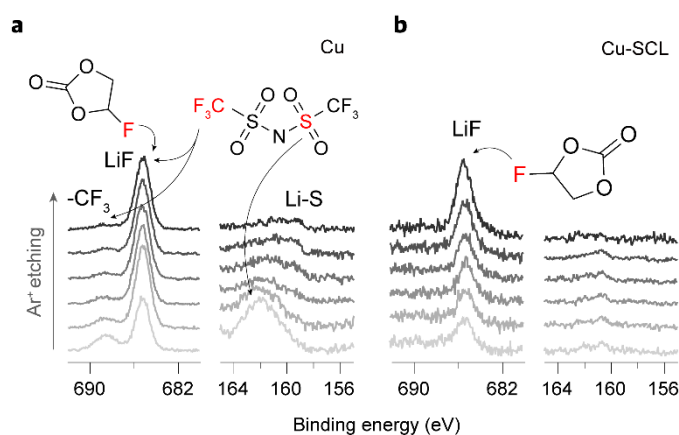

**Supplementary Figure 22. F1s and S2p spectra of SEI layer in 1 M LiTFSI EC/DMC +10% FEC +3% LiBOB. a, Bare Li. b, Li|S-CE/S-GE.**

In the SEI layer of Li|S-CE/S-GE, no decomposition signal of anion was observed, whereas decomposition signal of fluorinated solvent was observed. This means that the fluorinated solvent, not the anion, contributes dominantly to the SEI.

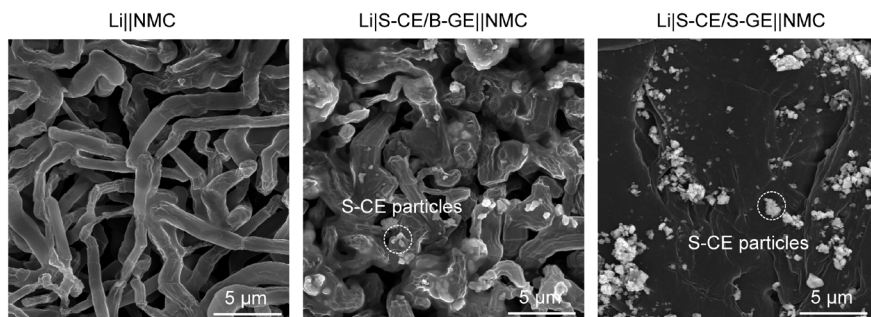

**Supplementary Figure 23. Li morphology in 1 M LiTFSI EC/DMC + 3% LiBOB 10% FEC.**

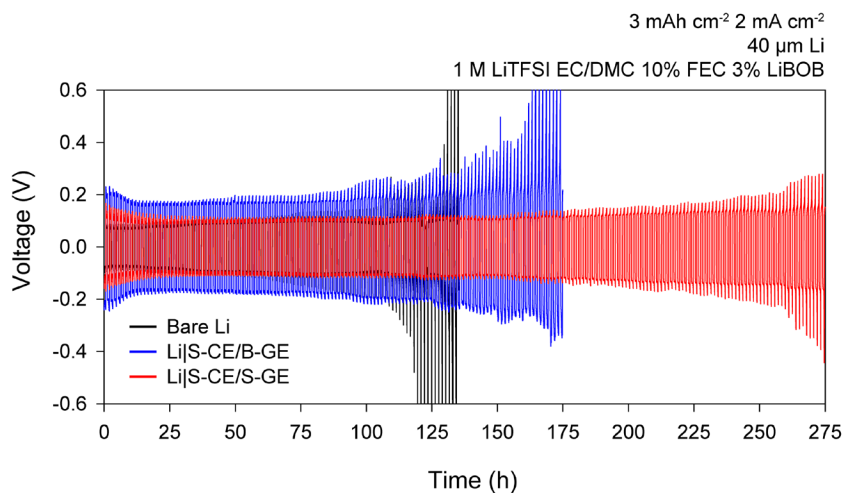

**Supplementary Figure 24.** Bare Li, Li|S-CE/B-GE, and Li|S-CE/S-GE symmetric cell at  $2 \text{ mAh cm}^{-2}$  and  $3 \text{ mA cm}^{-2}$  with carbonate electrolyte.

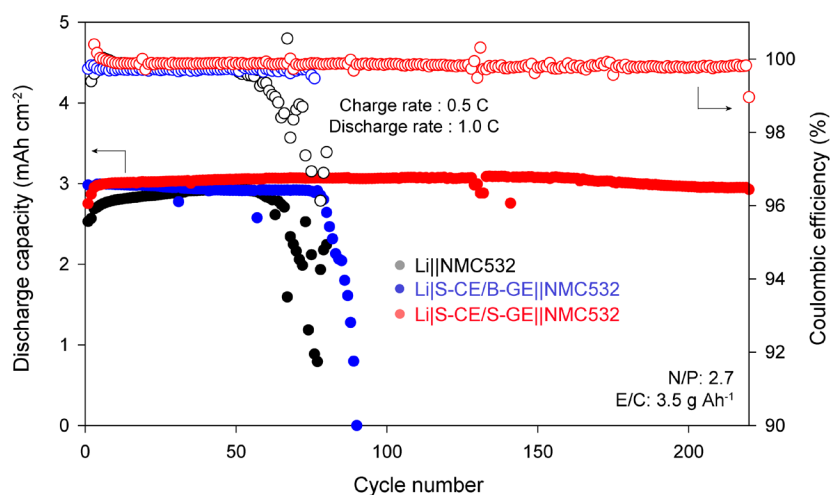

**Supplementary Figure 25.** Li||NMC532 full cell performance with 1.5 M LiFSI DME +50% TTFTE measured at 0.5 C constant current charging with 4.2 V cut-off voltage and 1.0 C discharging at  $25 \text{ }^\circ\text{C}$ .

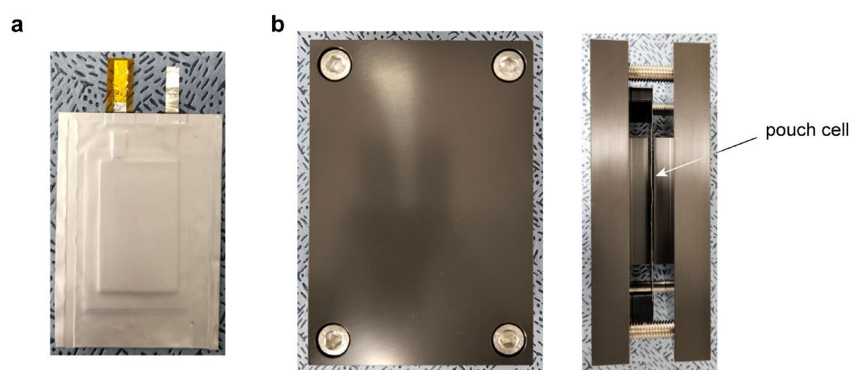

**Supplementary Figure 26. Optic images of pouch cell with pressure jig. a,** Prepared pouch cell.  
**b,** Top and side view of pressure jig.

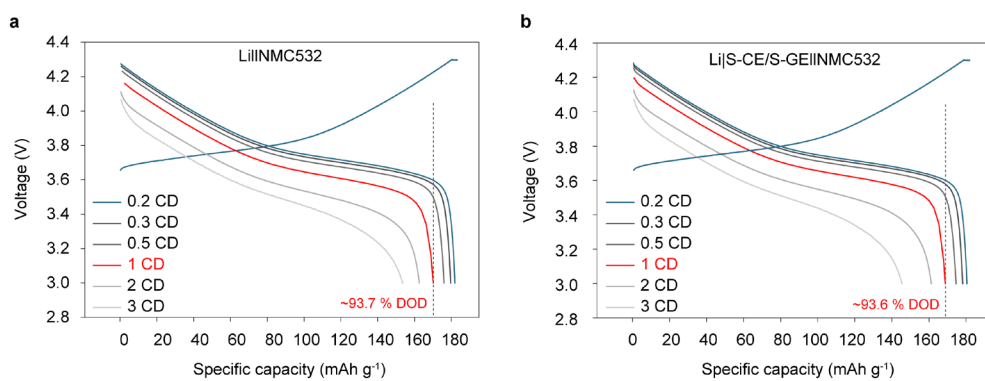

**Supplementary Figure 27. Discharge rate capabilities of Li||NMC532 and Li|S-CE/S-GE||NMC532 full cells. a,** Li||NMC532 **b,** Li|S-CE/S-GE||NMC532.

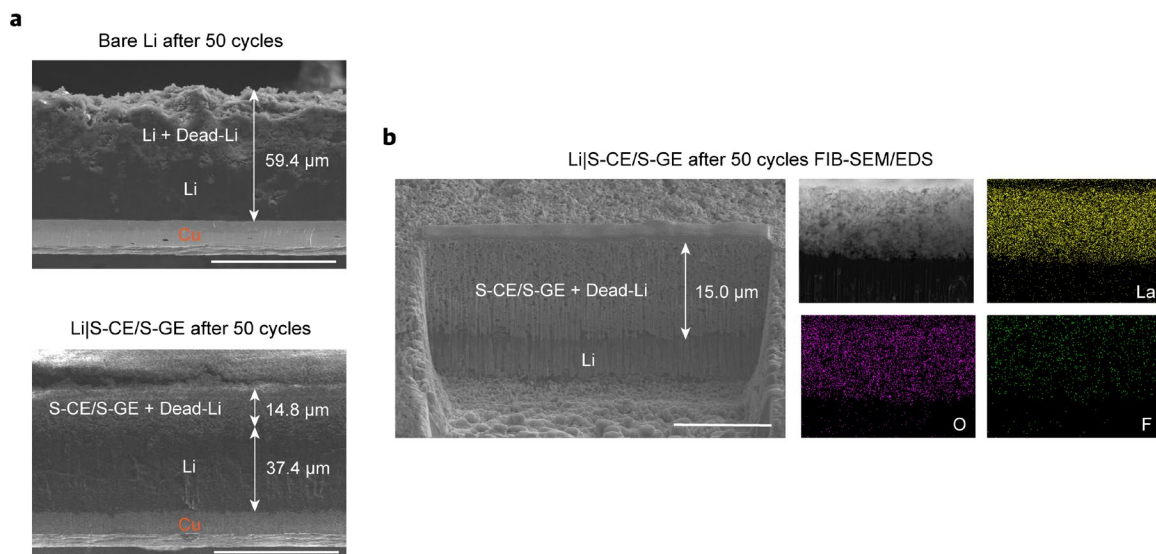

**Supplementary Figure 28. Cross-sectional morphology of the cycled bare Li and Li|S-CE/S-GE.** **a**, Cross-sectional SEM images. Scale bar: 50  $\mu\text{m}$ . **b**, FIB-SEM (52° tilt) and EDS images for the cycled Li|S-CE/S-GE. Scale bar: 10  $\mu\text{m}$ .

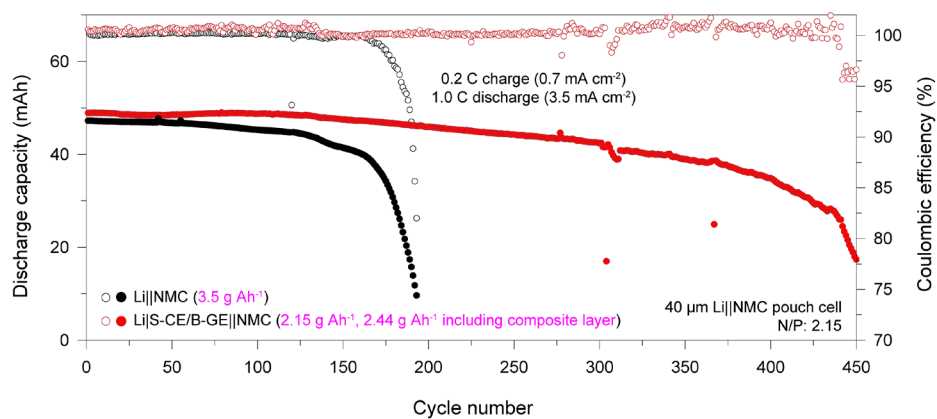

**Supplementary Figure 29. Comparison of the cycling stability for the composite-layer-free Li||NMC cell with an E/C ratio of 3.5 g Ah<sup>-1</sup> and the S-CE/S-GE (E/C ratio of 2.44 g Ah<sup>-1</sup> including the mass of the composite layer).**

**Supplementary Table 1. Estimated gravimetric and volumetric energy densities of prototype pouch cells without and with S-CE/S-GE composite layer.**

|                                          | <b>Li  NMC532</b>                           | <b>Li S-CE/S-GE<br/>  NMC532</b>            | <b>Li S-CE/S-GE<br/>  NMC532</b>            |
|------------------------------------------|---------------------------------------------|---------------------------------------------|---------------------------------------------|
| Al current collector (13 $\mu\text{m}$ ) | 3.51 mg $\text{cm}^{-2}$                    | 3.51 mg $\text{cm}^{-2}$                    | 3.51 mg $\text{cm}^{-2}$                    |
| Cu current collector (8 $\mu\text{m}$ )  | 7.17 mg $\text{cm}^{-2}$                    | 7.17 mg $\text{cm}^{-2}$                    | 7.17 mg $\text{cm}^{-2}$                    |
| Lithium metal (40 $\mu\text{m}$ )        | 2.14 mg $\text{cm}^{-2}$                    | 2.14 mg $\text{cm}^{-2}$                    | 2.14 mg $\text{cm}^{-2}$                    |
| S-CE/S-GE layer (6 $\mu\text{m}$ )       | -                                           | <b>1.07 mg <math>\text{cm}^{-2}</math></b>  | <b>1.07 mg <math>\text{cm}^{-2}</math></b>  |
| NMC532 cathode (61 $\mu\text{m}$ )       | 21.47 mg $\text{cm}^{-2}$                   | 21.47 mg $\text{cm}^{-2}$                   | 21.47 mg $\text{cm}^{-2}$                   |
| PE separator (19 $\mu\text{m}$ )         | 1.77 mg $\text{cm}^{-2}$                    | 1.77 mg $\text{cm}^{-2}$                    | 1.77 mg $\text{cm}^{-2}$                    |
| Electrolyte                              | E/C=2.15 g $\text{Ah}^{-1}$                 | E/C=2.15 g $\text{Ah}^{-1}$                 | E/C=1.28 g $\text{Ah}^{-1}$                 |
| Discharge capacity                       | 3.72 mAh $\text{cm}^{-2}$                   | 3.72 mAh $\text{cm}^{-2}$                   | 3.72 mAh $\text{cm}^{-2}$                   |
| Average discharge voltage (0.1C)         | 3.82 V                                      | 3.82 V                                      | 3.82 V                                      |
| Total stack energy (bi-cell)             | 28.41 mWh $\text{cm}^{-2}$                  | 28.41 mWh $\text{cm}^{-2}$                  | 28.41 mWh $\text{cm}^{-2}$                  |
| Total stack weight (bi-cell)             | 77.41 mg $\text{cm}^{-2}$                   | 79.55 mg $\text{cm}^{-2}$                   | 73.07 mg $\text{cm}^{-2}$                   |
| <b>Stack gravimetric energy density</b>  | <b>367.0 Wh <math>\text{kg}^{-1}</math></b> | <b>357.1 Wh <math>\text{kg}^{-1}</math></b> | <b>388.8 Wh <math>\text{kg}^{-1}</math></b> |
| <b>Stack volumetric energy density</b>   | <b>1088.5 Wh <math>\text{L}^{-1}</math></b> | <b>1040.7 Wh <math>\text{L}^{-1}</math></b> | <b>1040.7 Wh <math>\text{L}^{-1}</math></b> |
| <b>Cycle number</b>                      | <b>&lt;50 cycles</b>                        | <b>400 cycles</b>                           | <b>100 cycles</b>                           |

The gravimetric and volumetric energy density of the stacked bi-cells were calculated based on a previously suggested model<sup>6</sup>. The single bi-cell consists of one sheet of a double-side coated NMC cathode, one sheet of a double-side Li anode or double-side S-CE/S-GE composite-coated Li anode, two sheets of separator, and electrolyte.

## References

- 1 Odziemkowski, M. & Irish, D. E. An Electrochemical Study of the Reactivity at the Lithium Electrolyte/Bare Lithium Metal Interface: I. Purified Electrolytes. *J. Electrochem. Soc.* **139**, 3063-3074 (1992).
- 2 Boyle, D. T. *et al.* Transient Voltammetry with Ultramicroelectrodes Reveals the Electron Transfer Kinetics of Lithium Metal Anodes. *ACS Energy Lett.* **5**, 701-709 (2020).
- 3 Wu, J. *et al.* Dense PVDF-type polymer-in-ceramic electrolytes for solid state lithium batteries. *RSC Adv.* **10**, 22417-22421 (2020).
- 4 Allen, J. L., Wolfenstine, J., Rangasamy, E. & Sakamoto, J. Effect of substitution (Ta, Al, Ga) on the conductivity of  $\text{Li}_7\text{La}_3\text{Zr}_2\text{O}_{12}$ . *J. Power Sources* **206**, 315-319 (2012).
- 5 Huang, M. *et al.* Effect of sintering temperature on structure and ionic conductivity of  $\text{Li}_{7-x}\text{La}_3\text{Zr}_2\text{O}_{12-0.5x}$  ( $x=0.5\sim 0.7$ ) ceramics. *Solid State Ionics* **204-205**, 41-45 (2011).
- 6 Louli, A. J. *et al.* Diagnosing and correcting anode-free cell failure via electrolyte and morphological analysis. *Nat. Energy* **5**, 693-702 (2020).
