# Supplementary material for: Weakly coordinated Li ion in single-ion-conductor-based composite enabling low electrolyte content Li-metal batteries
Source: Nat Commun. 2023 Jul 8;14:4047. doi: 10.1038/s41467-023-39673-1 (PMC10329658; doi:10.1038/s41467-023-39673-1)
Supplement: Supplementary file 3 — Source Data [file 41467_2023_39673_MOESM3_ESM.xlsx]

## Sheet: Figure1
Fig. 1g
X (nm)	Li-K (arb. Units)	La-N (arb. Units)
0.5	2.4165e-09	1.6054e-09
1	2.3737e-09	1.6082e-09
1.5	2.3708e-09	1.6313e-09
2	2.3621e-09	1.5767e-09
2.5	2.3303e-09	1.5622e-09
3	2.3658e-09	1.5348e-09
3.5	2.4587e-09	1.5695e-09
4	2.4583e-09	1.5799e-09
4.5	2.4921e-09	1.5764e-09
5	2.538e-09	1.5892e-09
5.5	2.5896e-09	1.6079e-09
6	2.6727e-09	1.6253e-09
6.5	2.753e-09	1.6545e-09
7	2.7097e-09	1.6735e-09
7.5	2.7132e-09	1.6821e-09
8	2.7106e-09	1.7226e-09
8.5	2.683e-09	1.7604e-09
9	2.6306e-09	1.7952e-09
9.5	2.5144e-09	1.8262e-09
10	2.4263e-09	1.9377e-09
10.5	2.3549e-09	2.0817e-09
11	2.3691e-09	2.3104e-09
11.5	2.4576e-09	2.6513e-09
12	2.6296e-09	3.064e-09
12.5	2.772e-09	3.4793e-09
13	2.8674e-09	3.8259e-09
13.5	2.9722e-09	4.1664e-09
14	3.0051e-09	4.4395e-09
14.5	3.0064e-09	4.6674e-09
15	3.0065e-09	4.927e-09
15.5	3.0515e-09	5.2814e-09
16	3.0972e-09	5.6147e-09
16.5	3.1376e-09	5.7987e-09
17	3.1633e-09	5.9209e-09
17.5	3.1606e-09	6.0942e-09
18	3.1745e-09	6.2806e-09
18.5	3.1507e-09	6.5165e-09
19	3.2628e-09	6.843e-09
19.5	3.291e-09	7.1954e-09
20	3.3624e-09	7.6361e-09
20.5	3.287e-09	7.8192e-09
21	3.1138e-09	7.8681e-09
21.5	3.2303e-09	8.2058e-09
22	3.1627e-09	8.363e-09
22.5	3.0609e-09	8.3305e-09
23	3.1644e-09	8.6173e-09
23.5	3.161e-09	8.8621e-09
24	3.2173e-09	8.9115e-09
24.5	3.3046e-09	9.0896e-09
25	3.0916e-09	9.0516e-09
25.5	3.0667e-09	9.0455e-09
26	3.165e-09	9.1002e-09
26.5	3.0622e-09	9.1461e-09
27	3.2253e-09	9.3112e-09
27.5	3.2465e-09	9.3874e-09
28	3.1704e-09	9.399e-09
28.5	3.3667e-09	9.5193e-09
29	3.3706e-09	9.6071e-09

## Sheet: Figure2
Fig. 2a
1.5 M LiFSI DME				S-CE/B-PE				S-CE/B-GE				S-CE/S-PE			S-CE/S-GE
Raman shift (cm-1)	Intensity (arb. Units)			Raman shift (cm-1)	Intensity (arb. Units)			Raman shift (cm-1)	Intensity (arb. Units)			Raman shift (cm-1)	Intensity (arb. Units)		Raman shift (cm-1)	Intensity (arb. Units)
401.485	10113.5			401.485	10127			401.485	10334			401.485	10973		401.485	10428
403.115	10158.5			403.115	10192			403.115	10353			403.115	10992		403.115	10463
404.744	10159.5			404.744	10160			404.744	10332			404.744	10948		404.744	10429
406.373	10217.8			406.373	10196			406.373	10406			406.373	10991		406.373	10483
408	10260.3			408	10214			408	10459			408	11024		408	10496
409.628	10289.3			409.628	10241			409.628	10444			409.628	11023		409.628	10500
411.254	10330.3			411.254	10294			411.254	10458			411.254	11034		411.254	10553
412.881	10302			412.881	10253			412.881	10464			412.881	10963		412.881	10513
414.506	10379			414.506	10339			414.506	10542			414.506	11009		414.506	10581
416.131	10384.3			416.131	10316			416.131	10524			416.131	11021		416.131	10587
417.755	10379.5			417.755	10302			417.755	10501			417.755	10983		417.755	10556
419.378	10433.8			419.378	10358			419.378	10578			419.378	11023		419.378	10620
421.002	10467.8			421.002	10399			421.002	10598			421.002	11054		421.002	10629
422.624	10486.3			422.624	10409			422.624	10617			422.624	11083		422.624	10635
424.246	10459.5			424.246	10382			424.246	10579			424.246	11024		424.246	10609
425.868	10450.8			425.868	10385			425.868	10575			425.868	10969		425.868	10598
427.488	10564			427.488	10487			427.488	10678			427.488	11081		427.488	10700
429.108	10618.5			429.108	10538			429.108	10734			429.108	11126		429.108	10729
430.727	10630.8			430.727	10552			430.727	10751			430.727	11180		430.727	10765
432.345	10518.8			432.345	10490			432.345	10660			432.345	11047		432.345	10666
433.964	10467.5			433.964	10393			433.964	10575			433.964	10956		433.964	10585
435.582	10576.8			435.582	10533			435.582	10726			435.582	11076		435.582	10698
437.198	10654.5			437.198	10596			437.198	10779			437.198	11143		437.198	10775
438.815	10716			438.815	10652			438.815	10839			438.815	11273		438.815	10842
440.43	10753.5			440.43	10688			440.43	10874			440.43	11279		440.43	10862
442.045	10783.3			442.045	10706			442.045	10935			442.045	11334		442.045	10892
443.66	10755.5			443.66	10672			443.66	10886			443.66	11321		443.66	10846
445.274	10855.5			445.274	10789			445.274	11007			445.274	11438		445.274	10975
446.887	10841.5			446.887	10796			446.887	11063			446.887	11419		446.887	10968
448.5	10837.8			448.5	10817			448.5	11075			448.5	11420		448.5	10963
450.112	10888.8			450.112	10883			450.112	11123			450.112	11437		450.112	10994
451.724	10890			451.724	10918			451.724	11169			451.724	11446		451.724	11020
453.334	10892			453.334	10922			453.334	11155			453.334	11472		453.334	11009
454.944	10898			454.944	10949			454.944	11191			454.944	11482		454.944	10979
456.554	10957.8			456.554	11044			456.554	11309			456.554	11530		456.554	11066
458.163	10909.8			458.163	11002			458.163	11255			458.163	11491		458.163	10965
459.772	10865.5			459.772	10971			459.772	11184			459.772	11445		459.772	10967
461.379	10844			461.379	10983			461.379	11122			461.379	11431		461.379	10938
462.986	10865.8			462.986	10976			462.986	11128			462.986	11436		462.986	10946
464.593	10853.8			464.593	10924			464.593	11104			464.593	11402		464.593	10941
466.199	10813.5			466.199	10861			466.199	11056			466.199	11358		466.199	10942
467.805	10740.8			467.805	10790			467.805	10974			467.805	11283		467.805	10886
469.409	10767.8			469.409	10793			469.409	10986			469.409	11296		469.409	10920
471.013	10767.5			471.013	10771			471.013	10986			471.013	11280		471.013	10899
472.617	10775.3			472.617	10781			472.617	10971			472.617	11281		472.617	10884
474.22	10771.8			474.22	10768			474.22	10949			474.22	11293		474.22	10860
475.823	10728.3			475.823	10696			475.823	10917			475.823	11194		475.823	10831
477.424	10637			477.424	10579			477.424	10819			477.424	11019		477.424	10714
479.026	10637.5			479.026	10605			479.026	10799			479.026	11044		479.026	10692
480.626	10718			480.626	10661			480.626	10879			480.626	11100		480.626	10771
482.226	10757.8			482.226	10717			482.226	10921			482.226	11116		482.226	10803
483.826	10707.3			483.826	10626			483.826	10868			483.826	11029		483.826	10715
485.424	10679.5			485.424	10596			485.424	10806			485.424	10970		485.424	10669
487.022	10656.3			487.022	10576			487.022	10791			487.022	10923		487.022	10679
488.621	10668			488.621	10598			488.621	10808			488.621	10965		488.621	10654
490.217	10652.8			490.217	10608			490.217	10792			490.217	10924		490.217	10629
491.814	10646			491.814	10547			491.814	10767			491.814	10899		491.814	10619
493.409	10608.3			493.409	10541			493.409	10764			493.409	10935		493.409	10614
495.004	10615.3			495.004	10559			495.004	10728			495.004	10935		495.004	10622
496.6	10678.8			496.6	10580			496.6	10785			496.6	10939		496.6	10659
498.194	10652.8			498.194	10521			498.194	10732			498.194	10909		498.194	10657
499.787	10567.3			499.787	10485			499.787	10679			499.787	10861		499.787	10601
501.38	10514.8			501.38	10426			501.38	10634			501.38	10813		501.38	10548
502.972	10559.8			502.972	10501			502.972	10668			502.972	10871		502.972	10610
504.563	10601.8			504.563	10521			504.563	10701			504.563	10905		504.563	10643
506.155	10591			506.155	10520			506.155	10688			506.155	10901		506.155	10644
507.745	10503			507.745	10396			507.745	10589			507.745	10802		507.745	10546
509.335	10481.3			509.335	10366			509.335	10578			509.335	10776		509.335	10513
510.924	10517			510.924	10434			510.924	10643			510.924	10857		510.924	10578
512.513	10496.3			512.513	10404			512.513	10615			512.513	10817		512.513	10556
514.101	10433.5			514.101	10364			514.101	10551			514.101	10770		514.101	10494
515.688	10480			515.688	10389			515.688	10594			515.688	10845		515.688	10545
517.275	10516.8			517.275	10466			517.275	10654			517.275	10891		517.275	10595
518.862	10473.8			518.862	10443			518.862	10644			518.862	10857		518.862	10593
520.448	10526.8			520.448	10510			520.448	10710			520.448	10909		520.448	10610
522.033	10486			522.033	10482			522.033	10694			522.033	10832		522.033	10555
523.617	10527.3			523.617	10497			523.617	10711			523.617	10864		523.617	10555
525.201	10528.5			525.201	10466			525.201	10723			525.201	10843		525.201	10576
526.785	10442			526.785	10401			526.785	10630			526.785	10794		526.785	10501
528.367	10495.3			528.367	10431			528.367	10689			528.367	10842		528.367	10535
529.949	10545.5			529.949	10484			529.949	10718			529.949	10899		529.949	10601
531.531	10529			531.531	10463			531.531	10675			531.531	10899		531.531	10615
533.112	10474.8			533.112	10393			533.112	10617			533.112	10807		533.112	10565
534.693	10540.3			534.693	10438			534.693	10673			534.693	10859		534.693	10672
536.272	10556			536.272	10445			536.272	10679			536.272	10869		536.272	10673
537.852	10586.8			537.852	10469			537.852	10695			537.852	10895		537.852	10685
539.43	10621.8			539.43	10478			539.43	10726			539.43	10964		539.43	10724
541.008	10580.3			541.008	10435			541.008	10692			541.008	10939		541.008	10695
542.586	10492.5			542.586	10365			542.586	10596			542.586	10839		542.586	10611
544.162	10573			544.162	10387			544.162	10643			544.162	10919		544.162	10630
545.739	10591.3			545.739	10393			545.739	10659			545.739	10970		545.739	10695
547.315	10562.8			547.315	10403			547.315	10669			547.315	10973		547.315	10655
548.889	10576.5			548.889	10415			548.889	10668			548.889	11001		548.889	10639
550.464	10588.5			550.464	10438			550.464	10741			550.464	11062		550.464	10691
552.038	10569.3			552.038	10428			552.038	10714			552.038	11060		552.038	10719
553.612	10499.3			553.612	10378			553.612	10650			553.612	11024		553.612	10685
555.184	10515.8			555.184	10431			555.184	10686			555.184	11093		555.184	10676
556.756	10573.3			556.756	10481			556.756	10754			556.756	11143		556.756	10730
558.328	10471.5			558.328	10415			558.328	10686			558.328	11100		558.328	10662
559.899	10500			559.899	10420			559.899	10695			559.899	11148		559.899	10708
561.47	10559.5			561.47	10485			561.47	10760			561.47	11179		561.47	10763
563.04	10577.5			563.04	10494			563.04	10786			563.04	11201		563.04	10804
564.609	10564.8			564.609	10495			564.609	10802			564.609	11191		564.609	10785
566.178	10519.3			566.178	10440			566.178	10745			566.178	11102		566.178	10725
567.746	10509.5			567.746	10423			567.746	10755			567.746	11030		567.746	10676
569.313	10520.5			569.313	10447			569.313	10789			569.313	10977		569.313	10655
570.879	10498.8			570.879	10419			570.879	10737			570.879	10892		570.879	10587
572.446	10550.8			572.446	10464			572.446	10770			572.446	10875		572.446	10618
574.012	10554.8			574.012	10453			574.012	10767			574.012	10849		574.012	10597
575.577	10499			575.577	10379			575.577	10692			575.577	10755		575.577	10526
577.142	10452.8			577.142	10312			577.142	10618			577.142	10651		577.142	10435
578.706	10454			578.706	10265			578.706	10597			578.706	10610		578.706	10407
580.269	10474.5			580.269	10239			580.269	10535			580.269	10595		580.269	10425
581.832	10499.3			581.832	10242			581.832	10556			581.832	10623		581.832	10434
583.395	10502.5			583.395	10232			583.395	10557			583.395	10575		583.395	10393
584.957	10588			584.957	10296			584.957	10617			584.957	10618		584.957	10465
586.517	10483.8			586.517	10166			586.517	10473			586.517	10529		586.517	10376
588.078	10475			588.078	10151			588.078	10474			588.078	10533		588.078	10373
589.638	10448.8			589.638	10142			589.638	10439			589.638	10528		589.638	10393
591.197	10434.8			591.197	10146			591.197	10436			591.197	10559		591.197	10399
592.757	10436.5			592.757	10189			592.757	10435			592.757	10616		592.757	10442
594.315	10421.5			594.315	10199			594.315	10441			594.315	10627		594.315	10468
595.873	10443.5			595.873	10247			595.873	10485			595.873	10688		595.873	10485
597.429	10495			597.429	10329			597.429	10525			597.429	10758		597.429	10548
598.985	10406.3			598.985	10246			598.985	10471			598.985	10697		598.985	10489
600.542	10400			600.542	10223			600.542	10441			600.542	10656		600.542	10475
602.097	10326.3			602.097	10140			602.097	10391			602.097	10603		602.097	10419
603.652	10384			603.652	10198			603.652	10437			603.652	10689		603.652	10505
605.206	10375.3			605.206	10201			605.206	10422			605.206	10680		605.206	10454
606.76	10363			606.76	10212			606.76	10441			606.76	10656		606.76	10472
608.313	10366			608.313	10198			608.313	10448			608.313	10661		608.313	10448
609.866	10361.3			609.866	10204			609.866	10437			609.866	10625		609.866	10435
611.417	10346.5			611.417	10191			611.417	10419			611.417	10605		611.417	10431
612.969	10396.3			612.969	10231			612.969	10458			612.969	10674		612.969	10512
614.519	10409			614.519	10243			614.519	10468			614.519	10711		614.519	10517
616.069	10382			616.069	10236			616.069	10460			616.069	10695		616.069	10492
617.62	10371.8			617.62	10192			617.62	10437			617.62	10732		617.62	10495
619.169	10317			619.169	10139			619.169	10418			619.169	10724		619.169	10468
620.717	10339.3			620.717	10149			620.717	10382			620.717	10766		620.717	10487
622.265	10338.5			622.265	10180			622.265	10402			622.265	10835		622.265	10534
623.813	10320.5			623.813	10186			623.813	10399			623.813	10916		623.813	10530
625.359	10362.8			625.359	10207			625.359	10447			625.359	11093		625.359	10561
626.906	10342.5			626.906	10192			626.906	10437			626.906	11247		626.906	10647
628.451	10277.8			628.451	10159			628.451	10387			628.451	11289		628.451	10607
629.995	10235.8			629.995	10131			629.995	10345			629.995	11356		629.995	10614
631.54	10336			631.54	10213			631.54	10416			631.54	11477		631.54	10787
633.084	10282.5			633.084	10169			633.084	10361			633.084	11387		633.084	10709
634.628	10340			634.628	10235			634.628	10428			634.628	11371		634.628	10746
636.171	10343			636.171	10234			636.171	10484			636.171	11249		636.171	10718
637.712	10384			637.712	10292			637.712	10486			637.712	11130		637.712	10691
639.254	10452.8			639.254	10363			639.254	10555			639.254	11096		639.254	10727
640.795	10456.5			640.795	10350			640.795	10593			640.795	11056		640.795	10692
642.336	10410.3			642.336	10309			642.336	10580			642.336	11008		642.336	10627
643.876	10444			643.876	10342			643.876	10585			643.876	11024		643.876	10644
645.415	10475			645.415	10393			645.415	10629			645.415	11079		645.415	10684
646.954	10426.8			646.954	10368			646.954	10588			646.954	11039		646.954	10633
648.492	10491.3			648.492	10452			648.492	10670			648.492	11140		648.492	10717
650.029	10611			650.029	10580			650.029	10801			650.029	11276		650.029	10832
651.567	10618			651.567	10614			651.567	10823			651.567	11321		651.567	10851
653.103	10562.8			653.103	10533			653.103	10759			653.103	11288		653.103	10784
654.64	10563.5			654.64	10499			654.64	10748			654.64	11309		654.64	10775
656.175	10570.5			656.175	10569			656.175	10775			656.175	11374		656.175	10786
657.71	10534			657.71	10555			657.71	10747			657.71	11419		657.71	10781
659.244	10561.5			659.244	10588			659.244	10829			659.244	11485		659.244	10799
660.777	10657.5			660.777	10723			660.777	10927			660.777	11631		660.777	10941
662.311	10737.3			662.311	10843			662.311	11040			662.311	11830		662.311	11067
663.844	10630			663.844	10814			663.844	11013			663.844	11807		663.844	11036
665.375	10542.3			665.375	10768			665.375	10980			665.375	11805		665.375	11006
666.907	10525.5			666.907	10823			666.907	11007			666.907	11854		666.907	11034
668.438	10510			668.438	10831			668.438	11032			668.438	11918		668.438	11041
669.968	10424.5			669.968	10782			669.968	10906			669.968	11897		669.968	10999
671.498	10430.3			671.498	10824			671.498	10984			671.498	11967		671.498	11059
673.027	10467.3			673.027	10898			673.027	11056			673.027	12097		673.027	11129
674.556	10453.3			674.556	10895			674.556	11061			674.556	12142		674.556	11113
676.084	10427.5			676.084	10877			676.084	11050			676.084	12160		676.084	11123
677.611	10486.3			677.611	11006			677.611	11098			677.611	12298		677.611	11227
679.138	10539			679.138	11046			679.138	11202			679.138	12442		679.138	11317
680.665	10527			680.665	11053			680.665	11200			680.665	12493		680.665	11335
682.191	10532.5			682.191	11089			682.191	11227			682.191	12544		682.191	11334
683.716	10543			683.716	11082			683.716	11252			683.716	12552		683.716	11356
685.241	10520.3			685.241	11075			685.241	11228			685.241	12551		685.241	11364
686.765	10590.8			686.765	11135			686.765	11274			686.765	12613		686.765	11424
688.289	10614			688.289	11121			688.289	11262			688.289	12557		688.289	11406
689.811	10584.8			689.811	11060			689.811	11232			689.811	12450		689.811	11342
691.334	10594			691.334	11008			691.334	11185			691.334	12367		691.334	11349
692.856	10459.5			692.856	10814			692.856	11028			692.856	12142		692.856	11157
694.378	10475			694.378	10806			694.378	11028			694.378	12094		694.378	11130
695.898	10496.5			695.898	10781			695.898	11041			695.898	12039		695.898	11062
697.418	10442			697.418	10728			697.418	10946			697.418	11860		697.418	11023
698.938	10466.5			698.938	10701			698.938	10930			698.938	11789		698.938	11014
700.457	10425.5			700.457	10612			700.457	10856			700.457	11696		700.457	10924
701.976	10434.8			701.976	10569			701.976	10836			701.976	11608		701.976	10896
703.494	10516.3			703.494	10629			703.494	10899			703.494	11609		703.494	10924
705.011	10486			705.011	10562			705.011	10823			705.011	11459		705.011	10842
706.528	10425.3			706.528	10513			706.528	10739			706.528	11322		706.528	10761
708.045	10513			708.045	10563			708.045	10830			708.045	11379		708.045	10821
709.56	10608.3			709.56	10628			709.56	10916			709.56	11410		709.56	10879
711.076	10579.8			711.076	10548			711.076	10835			711.076	11295		711.076	10797
712.59	10515.8			712.59	10476			712.59	10787			712.59	11175		712.59	10704
714.104	10520.3			714.104	10457			714.104	10812			714.104	11113		714.104	10655
715.618	10528.3			715.618	10429			715.618	10838			715.618	11058		715.618	10604
717.131	10670			717.131	10495			717.131	10978			717.131	11139		717.131	10675
718.643	10716			718.643	10550			718.643	11036			718.643	11166		718.643	10713
720.155	10794.8			720.155	10591			720.155	11179			720.155	11195		720.155	10746
721.667	10825.5			721.667	10594			721.667	11289			721.667	11213		721.667	10730
723.178	10916.5			723.178	10676			723.178	11492			723.178	11312		723.178	10779
724.688	11051.8			724.688	10819			724.688	11651			724.688	11436		724.688	10896
726.198	11051			726.198	10831			726.198	11733			726.198	11450		726.198	10868
727.707	11114.3			727.707	10956			727.707	11923			727.707	11556		727.707	10926
729.215	11168.5			729.215	11091			729.215	12051			729.215	11656		729.215	10991
730.723	11148.5			730.723	11167			730.723	12121			730.723	11738		730.723	11003
732.231	11194.3			732.231	11331			732.231	12261			732.231	11883		732.231	11097
733.738	11227.3			733.738	11533			733.738	12406			733.738	11987		733.738	11154
735.244	11198			735.244	11706			735.244	12463			735.244	12070		735.244	11192
736.75	11132			736.75	11820			736.75	12476			736.75	12138		736.75	11230
738.256	11122.3			738.256	12030			738.256	12564			738.256	12271		738.256	11257
739.76	11137.5			739.76	12239			739.76	12619			739.76	12439		739.76	11376
741.265	11074			741.265	12399			741.265	12639			741.265	12543		741.265	11430
742.769	11021.3			742.769	12507			742.769	12556			742.769	12666		742.769	11439
744.271	10971.5			744.271	12544			744.271	12459			744.271	12878		744.271	11520
745.774	10997.5			745.774	12597			745.774	12447			745.774	13227		745.774	11690
747.276	10968.3			747.276	12531			747.276	12337			747.276	13539		747.276	11808
748.777	10880.8			748.777	12395			748.777	12142			748.777	13838		748.777	11854
750.278	10888			750.278	12302			750.278	12058			750.278	14129		750.278	11924
751.779	10835.8			751.779	12161			751.779	11954			751.779	14171		751.779	11867
753.278	10863.5			753.278	12088			753.278	11889			753.278	14088		753.278	11801
754.778	10778			754.778	11878			754.778	11729			754.778	13735		754.778	11552
756.276	10754			756.276	11751			756.276	11642			756.276	13345		756.276	11380
757.775	10740.8			757.775	11655			757.775	11576			757.775	12984		757.775	11282
759.272	10749.5			759.272	11556			759.272	11473			759.272	12698		759.272	11201
760.77	10746.8			760.77	11464			760.77	11441			760.77	12442		760.77	11201
762.266	10716.8			762.266	11358			762.266	11419			762.266	12227		762.266	11172
763.762	10701			763.762	11293			763.762	11366			763.762	12111		763.762	11137
765.258	10747			765.258	11301			765.258	11383			765.258	12084		765.258	11192
766.752	10743.3			766.752	11269			766.752	11327			766.752	12035		766.752	11192
768.247	10732.5			768.247	11233			768.247	11308			768.247	12052		768.247	11242
769.741	10757.8			769.741	11194			769.741	11318			769.741	12147		769.741	11304
771.234	10706.8			771.234	11107			771.234	11264			771.234	12151		771.234	11273
772.726	10676.5			772.726	11096			772.726	11239			772.726	12266		772.726	11343
774.219	10727.8			774.219	11108			774.219	11292			774.219	12423		774.219	11436
775.711	10635.8			775.711	11019			775.711	11167			775.711	12403		775.711	11352
777.202	10706			777.202	11112			777.202	11232			777.202	12579		777.202	11447
778.692	10647.5			778.692	11013			778.692	11168			778.692	12551		778.692	11391
780.182	10597.3			780.182	10925			780.182	11125			780.182	12488		780.182	11311
781.672	10612			781.672	10944			781.672	11106			781.672	12484		781.672	11281
783.161	10633.3			783.161	10973			783.161	11075			783.161	12377		783.161	11269
784.649	10646.5			784.649	10927			784.649	11108			784.649	12283		784.649	11275
786.137	10705.3			786.137	10954			786.137	11131			786.137	12261		786.137	11267
787.624	10675			787.624	10904			787.624	11096			787.624	12116		787.624	11212
789.111	10618			789.111	10803			789.111	11013			789.111	11947		789.111	11099
790.598	10631			790.598	10780			790.598	11014			790.598	11913		790.598	11078
792.083	10614.5			792.083	10753			792.083	10993			792.083	11854		792.083	11099
793.568	10613.3			793.568	10713			793.568	10931			793.568	11787		793.568	11055
795.053	10644			795.053	10727			795.053	10943			795.053	11768		795.053	11073
796.537	10599.5			796.537	10680			796.537	10906			796.537	11692		796.537	11030
798.021	10640.8			798.021	10687			798.021	10985			798.021	11726		798.021	11062
799.503	10558.5			799.503	10631			799.503	10871			799.503	11594		799.503	10976
800.986	10606.5			800.986	10674			800.986	10906			800.986	11595		800.986	11020
802.468	10601.8			802.468	10625			802.468	10875			802.468	11528		802.468	11013
803.949	10622.3			803.949	10637			803.949	10893			803.949	11547		803.949	11009
805.43	10711.3			805.43	10735			805.43	10997			805.43	11619		805.43	11095
806.91	10778.3			806.91	10786			806.91	11071			806.91	11658		806.91	11140
808.39	10678.3			808.39	10672			808.39	10972			808.39	11582		808.39	11066
809.869	10703.3			809.869	10707			809.869	10950			809.869	11600		809.869	11148
811.348	10729.5			811.348	10703			811.348	11014			811.348	11614		811.348	11160
812.826	10708.5			812.826	10672			812.826	10961			812.826	11579		812.826	11140
814.304	10720			814.304	10678			814.304	10956			814.304	11553		814.304	11178
815.781	10677.8			815.781	10607			815.781	10951			815.781	11511		815.781	11151
817.258	10663.8			817.258	10574			817.258	10948			817.258	11446		817.258	11120
818.734	10722.8			818.734	10631			818.734	11010			818.734	11424		818.734	11164
820.209	10775			820.209	10665			820.209	11037			820.209	11427		820.209	11228
821.684	10804			821.684	10669			821.684	11093			821.684	11455		821.684	11234
823.158	10814.8			823.158	10672			823.158	11123			823.158	11421		823.158	11207
824.632	10900.3			824.632	10706			824.632	11157			824.632	11434		824.632	11268
826.106	10900.8			826.106	10682			826.106	11183			826.106	11364		826.106	11237
827.579	10906			827.579	10681			827.579	11194			827.579	11331		827.579	11241
829.051	10983			829.051	10708			829.051	11264			829.051	11371		829.051	11234
830.523	10975			830.523	10679			830.523	11299			830.523	11318		830.523	11166
831.994	11019			831.994	10693			831.994	11315			831.994	11302		831.994	11213
833.465	11118			833.465	10718			833.465	11414			833.465	11353		833.465	11319
834.935	11188.5			834.935	10755			834.935	11468			834.935	11392		834.935	11358
836.405	11216.5			836.405	10779			836.405	11510			836.405	11368		836.405	11376
837.874	11277			837.874	10751			837.874	11498			837.874	11341		837.874	11402
839.343	11310.8			839.343	10749			839.343	11509			839.343	11331		839.343	11409
840.81	11272.5			840.81	10703			840.81	11487			840.81	11228		840.81	11372
842.278	11282.8			842.278	10703			842.278	11428			842.278	11193		842.278	11386
843.745	11347.3			843.745	10758			843.745	11450			843.745	11237		843.745	11472
845.211	11376.8			845.211	10775			845.211	11497			845.211	11264		845.211	11607
846.678	11388.5			846.678	10790			846.678	11487			846.678	11253		846.678	11618
848.142	11417.3			848.142	10827			848.142	11521			848.142	11273		848.142	11661
849.607	11470			849.607	10873			849.607	11544			849.607	11314		849.607	11706
851.072	11390.8			851.072	10796			851.072	11472			851.072	11223		851.072	11617
852.535	11329			852.535	10716			852.535	11415			852.535	11174		852.535	11524
853.999	11250.3			853.999	10643			853.999	11306			853.999	11129		853.999	11393
855.461	11219.8			855.461	10590			855.461	11254			855.461	11104		855.461	11322
856.924	11274.3			856.924	10634			856.924	11316			856.924	11153		856.924	11309
858.385	11316.5			858.385	10677			858.385	11357			858.385	11219		858.385	11297
859.847	11292.3			859.847	10617			859.847	11314			859.847	11137		859.847	11193
861.307	11404.8			861.307	10668			861.307	11421			861.307	11195		861.307	11230
862.768	11468.5			862.768	10666			862.768	11520			862.768	11253		862.768	11240
864.227	11427.3			864.227	10563			864.227	11500			864.227	11169		864.227	11168
865.686	11440.5			865.686	10510			865.686	11567			865.686	11104		865.686	11146
867.145	11576.5			867.145	10575			867.145	11696			867.145	11180		867.145	11201
868.603	11699			868.603	10641			868.603	11843			868.603	11227		868.603	11239
870.06	11721			870.06	10597			870.06	11897			870.06	11196		870.06	11218
871.517	11782.5			871.517	10601			871.517	11941			871.517	11153		871.517	11188
872.973	11887			872.973	10643			872.973	12009			872.973	11219		872.973	11266
874.43	11854			874.43	10606			874.43	11950			874.43	11196		874.43	11225
875.885	11816.8			875.885	10638			875.885	11854			875.885	11239		875.885	11184
877.34	11609.5			877.34	10553			877.34	11605			877.34	11163		877.34	11057
878.794	11385.8			878.794	10480			878.794	11366			878.794	11089		878.794	10941
880.248	11218.3			880.248	10518			880.248	11219			880.248	11100		880.248	10923
881.701	11035.5			881.701	10484			881.701	11069			881.701	11091		881.701	10894
883.154	10853			883.154	10456			883.154	10930			883.154	11062		883.154	10835
884.606	10714.3			884.606	10398			884.606	10823			884.606	11021		884.606	10778
886.058	10718.3			886.058	10462			886.058	10856			886.058	11114		886.058	10820
887.509	10601.3			887.509	10401			887.509	10770			887.509	11056		887.509	10740
888.959	10596			888.959	10421			888.959	10763			888.959	11091		888.959	10747
890.41	10619.5			890.41	10488			890.41	10797			890.41	11118		890.41	10811
891.86	10644			891.86	10512			891.86	10832			891.86	11149		891.86	10852
893.309	10547.5			893.309	10438			893.309	10724			893.309	11075		893.309	10757
894.757	10514.5			894.757	10418			894.757	10715			894.757	11063		894.757	10752
896.205	10632.5			896.205	10537			896.205	10810			896.205	11179		896.205	10870
897.653	10699			897.653	10605			897.653	10867			897.653	11248		897.653	10948
899.1	10649.5			899.1	10568			899.1	10824			899.1	11190		899.1	10900
900.546	10636			900.546	10560			900.546	10823			900.546	11152		900.546	10889
901.993	10607			901.993	10509			901.993	10767			901.993	11086		901.993	10852
903.438	10627.3			903.438	10516			903.438	10781			903.438	11071		903.438	10897
904.883	10647			904.883	10534			904.883	10819			904.883	11114		904.883	10939
906.327	10641			906.327	10532			906.327	10807			906.327	11100		906.327	10931
907.772	10778			907.772	10629			907.772	10929			907.772	11241		907.772	11056
909.215	10782			909.215	10605			909.215	10950			909.215	11263		909.215	11065
910.657	10793.8			910.657	10646			910.657	10934			910.657	11270		910.657	11092
912.1	10745.5			912.1	10637			912.1	10875			912.1	11181		912.1	11033
913.542	10709			913.542	10592			913.542	10861			913.542	11176		913.542	11002
914.983	10750.8			914.983	10602			914.983	10867			914.983	11222		914.983	11029
916.423	10783.3			916.423	10625			916.423	10924			916.423	11252		916.423	11047
917.864	10785.5			917.864	10646			917.864	10901			917.864	11292		917.864	11080
919.304	10849.5			919.304	10691			919.304	10983			919.304	11406		919.304	11155
920.743	10950.5			920.743	10756			920.743	11065			920.743	11544		920.743	11254
922.182	10929			922.182	10721			922.182	11049			922.182	11558		922.182	11242
923.62	10944			923.62	10749			923.62	11046			923.62	11650		923.62	11333
925.058	10984			925.058	10788			925.058	11068			925.058	11816		925.058	11420
926.495	11023			926.495	10842			926.495	11147			926.495	11990		926.495	11538
927.931	11110.5			927.931	10959			927.931	11210			927.931	12257		927.931	11737
929.368	11093			929.368	10960			929.368	11208			929.368	12402		929.368	11830
930.803	11036.3			930.803	10880			930.803	11167			930.803	12491		930.803	11837
932.239	11077.8			932.239	10951			932.239	11214			932.239	12550		932.239	11904
933.673	11153.5			933.673	10999			933.673	11266			933.673	12599		933.673	11873
935.108	11047.3			935.108	10892			935.108	11190			935.108	12400		935.108	11653
936.541	11064.8			936.541	10902			936.541	11203			936.541	12293		936.541	11571
937.975	11145.5			937.975	10968			937.975	11255			937.975	12241		937.975	11571
939.406	11124.5			939.406	10946			939.406	11226			939.406	12085		939.406	11499
940.839	11168			940.839	10982			940.839	11283			940.839	12021		940.839	11473
942.271	11230.5			942.271	11032			942.271	11355			942.271	11945		942.271	11490
943.701	11184.5			943.701	10997			943.701	11294			943.701	11768		943.701	11440
945.132	11140			945.132	10944			945.132	11226			945.132	11584		945.132	11368
946.562	11084.5			946.562	10850			946.562	11157			946.562	11413		946.562	11279
947.991	11012.8			947.991	10814			947.991	11070			947.991	11296		947.991	11186
949.421	11078			949.421	10853			949.421	11157			949.421	11339		949.421	11222
950.849	11108.8			950.849	10865			950.849	11204			950.849	11330		950.849	11253
952.277	11167.5			952.277	10935			952.277	11249			952.277	11351		952.277	11327
953.704	11160.3			953.704	10915			953.704	11240			953.704	11305		953.704	11306
955.131	11123.5			955.131	10862			955.131	11190			955.131	11256		955.131	11244
956.558	11163.8			956.558	10911			956.558	11224			956.558	11269		956.558	11304
957.984	11168.8			957.984	10879			957.984	11198			957.984	11279		957.984	11310
959.409	11152			959.409	10871			959.409	11181			959.409	11220		959.409	11272
960.834	11164.8			960.834	10860			960.834	11197			960.834	11184		960.834	11250
962.258	11226.3			962.258	10928			962.258	11248			962.258	11236		962.258	11331
963.682	11167.5			963.682	10847			963.682	11189			963.682	11165		963.682	11266
965.105	11135			965.105	10799			965.105	11130			965.105	11126		965.105	11222
966.529	11164			966.529	10807			966.529	11167			966.529	11150		966.529	11285
967.951	11178.3			967.951	10826			967.951	11198			967.951	11179		967.951	11307
969.373	11224.3			969.373	10907			969.373	11241			969.373	11227		969.373	11373
970.794	11216.5			970.794	10919			970.794	11268			970.794	11270		970.794	11392
972.215	11221.8			972.215	10939			972.215	11287			972.215	11295		972.215	11406
973.636	11232.5			973.636	10965			973.636	11310			973.636	11324		973.636	11461
975.055	11173.5			975.055	10903			975.055	11276			975.055	11281		975.055	11418
976.475	11185.5			976.475	10937			976.475	11295			976.475	11291		976.475	11443
977.894	11098.3			977.894	10851			977.894	11229			977.894	11225		977.894	11387
979.311	11111.5			979.311	10875			979.311	11241			979.311	11231		979.311	11398
980.729	11181			980.729	10925			980.729	11293			980.729	11288		980.729	11443
982.147	11086.8			982.147	10848			982.147	11245			982.147	11211		982.147	11374
983.564	11104			983.564	10861			983.564	11248			983.564	11285		983.564	11405
984.98	11114			984.98	10886			984.98	11277			984.98	11305		984.98	11443
986.396	11098			986.396	10851			986.396	11245			986.396	11275		986.396	11425
987.811	11132			987.811	10873			987.811	11236			987.811	11348		987.811	11434
989.226	11205.5			989.226	10947			989.226	11289			989.226	11418		989.226	11468
990.64	11231			990.64	10993			990.64	11335			990.64	11454		990.64	11531
992.054	11217			992.054	10988			992.054	11335			992.054	11479		992.054	11495
993.467	11133			993.467	10905			993.467	11249			993.467	11394		993.467	11415
994.88	11060			994.88	10837			994.88	11167			994.88	11325		994.88	11329
996.292	11104			996.292	10873			996.292	11191			996.292	11345		996.292	11379
997.704	11165.3			997.704	10916			997.704	11239			997.704	11378		997.704	11458
999.115	11227			999.115	10976			999.115	11320			999.115	11457		999.115	11476

## Sheet: Figure3
Fig. 3f
	DME (mol/l)	FSI- (mol/l)	TFTFE (mol/l)
Before cell cycling	4	1.5	4.346
Li||Li after 150 hours	1.83	0.685	0.0674
Li|S-CE/S-GE after 400 hours	3.05	1.33	0.0919

## Sheet: Figure4
Fig. 4c
Cycle number	Li||NMC532	Li|S-CE/B-GE||NMC532	Li|S-CE/S-GE||NMC532
1	99.7253	99.7472	99.8704
2	99.6953	99.7634	99.8872
3	99.7528	99.7875	99.9045
4	99.7573	99.7953	99.9152
5	99.7923	99.8032	99.9057
6	99.8438	99.8354	99.9148
7	99.9186	99.8423	99.9131
8	99.9305	99.8467	99.9214
9	99.8633	99.8581	99.911
10	99.886	99.8632	99.9132
11	99.8137	99.8652	99.9292
12	99.8293	99.8568	99.9035
13	99.7564	99.8514	99.897
14	99.8207	99.8431	99.8796
15	99.7608	99.8347	99.9048
Average	99.8097	99.8262	99.9047
